# Supplementary material for: Antifungal Peptide P852 Controls Fusarium Wilt in Faba Bean (Vicia faba L.) by Promoting Antioxidant Defense and Isoquinoline Alkaloid, Betaine, and Arginine Biosyntheses
Source: MDPI journal article supplement (doi:10.3390/antiox11091767), 2022-09-07
Supplement: s1 [file s1]

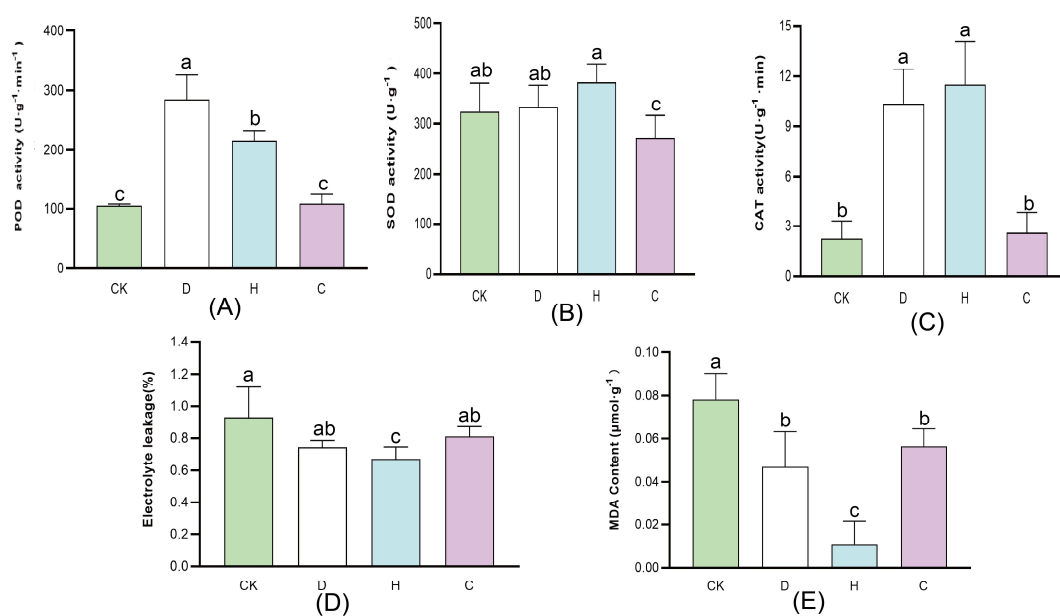

**Figure S1.** Effects of antifungal peptide treatments for 96 h on antioxidant capacity in the roots of faba bean that were infected with *Fusarium* wilt. (A) guaiacol peroxidase (POD) activity, (B) superoxide dismutase (SOD activity), (C) catalase (CAT) activity, (D) Electrolyte leakage, (E) MDA content. Values are means  $\pm$  SD ( $n = 3$ ). Bars marked with different letters (a, b, c) represent significant differences ( $p < 0.05$ ). The *Fusarium* wilt of faba bean were inoculated H (10  $\mu$ g/mL), and D (1  $\mu$ g/mL) concentrations, 10g/mL carbendazim solution(C), and seedlings treated with sterile water served as controls (CK).

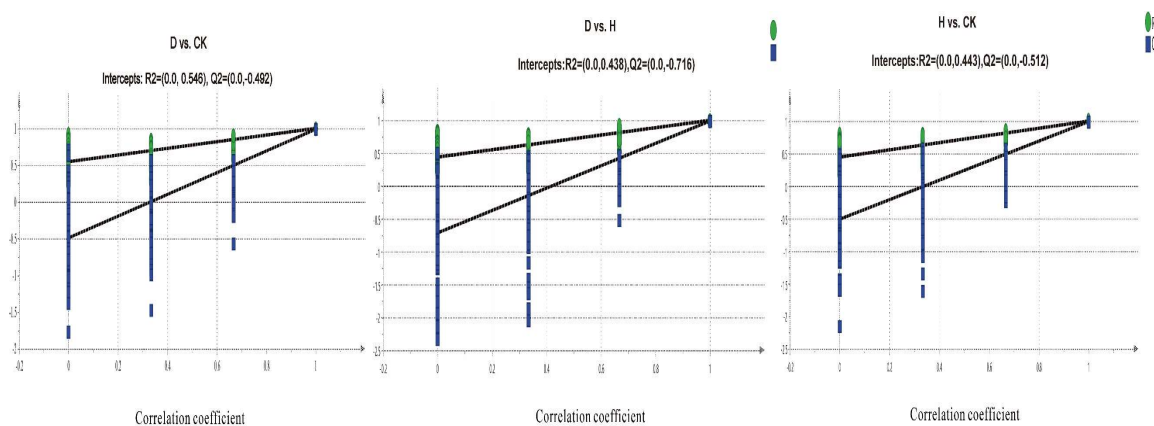

**Figure S2.** OPLS-DA permutation plots of the validate models in response to different treatments. H concentration treatment: P852 of 10 $\mu$ g/mL and D concentration treatment: 1 $\mu$ g/mL of P852 and CK: sterile water to treat *Fusarium* wilt the roots of Faba bean.
